# Supplementary material for: Association between Consumption of Dietary Supplements and Chronic Kidney Disease Prevalence: Results of the Korean Nationwide Population-Based Survey
Source: MDPI journal article supplement (doi:10.3390/nu15040822), 2023-02-05
Supplement: s1 [file s1]

Supplementary Table S1. General participant characteristics

| Types of dietary supplement     | CKD ( <i>n</i> = 396) |         | Normal ( <i>n</i> = 12,875) |          | p-value |
|---------------------------------|-----------------------|---------|-----------------------------|----------|---------|
|                                 | n                     | %       | n                           | %        |         |
| Aloe                            |                       |         |                             |          | >.999   |
| Yes                             | 0                     | (0.00)  | 5                           | (100.00) |         |
| No                              | 396                   | (2.99)  | 12870                       | (97.01)  |         |
| Amino acids & Protein           |                       |         |                             |          | 0.487   |
| Yes                             | 1                     | (4.55)  | 21                          | (95.45)  |         |
| No                              | 395                   | (2.98)  | 12854                       | (97.02)  |         |
| Chlorella/Spirulina             |                       |         |                             |          | 0.621   |
| Yes                             | 1                     | (3.13)  | 31                          | (96.88)  |         |
| No                              | 395                   | (2.98)  | 12844                       | (97.02)  |         |
| Gamma-linolenic acid            |                       |         |                             |          | >.999   |
| Yes                             | 0                     | (0.00)  | 14                          | (100.00) |         |
| No                              | 396                   | (2.99)  | 12861                       | (97.01)  |         |
| Ginseng & Red ginseng           |                       |         |                             |          | 0.030   |
| Yes                             | 12                    | (5.45)  | 208                         | (94.55)  |         |
| No                              | 384                   | (2.94)  | 12667                       | (97.06)  |         |
| Glucosamine                     |                       |         |                             |          | >.999   |
| Yes                             | 0                     | (0.00)  | 14                          | (100.00) |         |
| No                              | 396                   | (2.99)  | 12861                       | (97.01)  |         |
| Herbal medicine (plant extract) |                       |         |                             |          | 0.281   |
| Asian                           |                       |         |                             |          |         |
| Yes                             | 2                     | (5.71)  | 33                          | (94.29)  |         |
| No                              | 394                   | (2.98)  | 12842                       | (97.02)  |         |
| Herbal medicine (plant extract) |                       |         |                             |          | 0.072   |
| Berry                           |                       |         |                             |          |         |
| Yes                             | 2                     | (13.33) | 13                          | (86.67)  |         |
| No                              | 394                   | (2.97)  | 12862                       | (97.03)  |         |
| Herbal medicine (plant extract) |                       |         |                             |          | >.999   |
| Ginkgo Biloba                   |                       |         |                             |          |         |
| Yes                             | 0                     | (0.00)  | 12                          | (100.00) |         |
| No                              | 396                   | (2.99)  | 12863                       | (97.01)  |         |
| Herbal medicine (plant extract) |                       |         |                             |          | >.999   |
| Others                          |                       |         |                             |          |         |
| Yes                             | 1                     | (1.72)  | 57                          | (98.28)  |         |
| No                              | 395                   | (2.99)  | 12818                       | (97.01)  |         |
| Lutein containing supplements   |                       |         |                             |          | 0.420   |
| Yes                             | 5                     | (4.07)  | 118                         | (95.93)  |         |
| No                              | 391                   | (2.97)  | 12757                       | (97.03)  |         |
| Methyl Sulfonyl Methane         |                       |         |                             |          | >.999   |
| Yes                             | 0                     | (0.00)  | 31                          | (100.00) |         |
| No                              | 396                   | (2.99)  | 12844                       | (97.01)  |         |
| Milk thistle                    |                       |         |                             |          | >.999   |
| Yes                             | 0                     | (0.00)  | 5                           | (100.00) |         |
| No                              | 396                   | (2.99)  | 12870                       | (97.01)  |         |
| Omega-3 fatty acid              |                       |         |                             |          | 0.627   |
| Yes                             | 0                     | (0.00)  | 35                          | (100.00) |         |
| No                              | 396                   | (2.99)  | 12840                       | (97.01)  |         |
| Probiotics (pre-, post-)        |                       |         |                             |          | 0.281   |
| Yes                             | 13                    | (3.99)  | 313                         | (96.01)  |         |
| No                              | 383                   | (2.96)  | 12562                       | (97.04)  |         |
| Propolis                        |                       |         |                             |          | 0.191   |
| Yes                             | 1                     | (0.77)  | 129                         | (99.23)  |         |
| No                              | 395                   | (3.01)  | 12746                       | (96.99)  |         |
| Vitamin & Mineral               |                       |         |                             |          | >.999   |
| Yes                             | 0                     | (0.00)  | 25                          | (100.00) |         |
| No                              | 396                   | (2.99)  | 12850                       | (97.01)  |         |

The data are shown as N (%) for categorical variables, and p-values were calculated using the chi-square test or Student's t-test. CKD, chronic kidney disease (CKD was defined by eGFR threshold of 75, 60, and 45 mL/min/1.73 m<sup>2</sup> for younger than 40, 40 to 64, and 65 years or older, respectively, or a positive dipstick urinalysis).

Supplementary Table S2. General characteristics of participants with and without a history of CKD or risk factors for CKD.

| Types of dietary supplement                   | Healthy population ( <i>n</i> = 8,164) |        |                            |          |          | Unhealthy population ( <i>n</i> = 4,568) |         |                            |          |          |
|-----------------------------------------------|----------------------------------------|--------|----------------------------|----------|----------|------------------------------------------|---------|----------------------------|----------|----------|
|                                               | CKD ( <i>n</i> = 125)                  |        | Normal ( <i>n</i> = 8,039) |          | <i>p</i> | CKD ( <i>n</i> = 582)                    |         | Normal ( <i>n</i> = 3,986) |          | <i>p</i> |
|                                               | <i>n</i>                               | %      | <i>n</i>                   | %        |          | <i>n</i>                                 | %       | <i>n</i>                   | %        |          |
| Aloe                                          |                                        |        |                            |          | >.999    |                                          |         |                            |          | >.999    |
| Yes                                           | 0                                      | (0.00) | 4                          | (100.00) |          | 0                                        | (0.00)  | 1                          | (100.00) |          |
| No                                            | 125                                    | (1.53) | 8035                       | (98.47)  |          | 582                                      | (12.74) | 3985                       | (87.26)  |          |
| Amino acids & Protein                         |                                        |        |                            |          | >.999    |                                          |         |                            |          | 0.073    |
| Yes                                           | 0                                      | (0.00) | 8                          | (100.00) |          | 4                                        | (30.77) | 9                          | (69.23)  |          |
| No                                            | 125                                    | (1.53) | 8031                       | (98.47)  |          | 578                                      | (12.69) | 3977                       | (87.31)  |          |
| Chlorella/Spirulina                           |                                        |        |                            |          | >.999    |                                          |         |                            |          | 0.321    |
| Yes                                           | 0                                      | (0.00) | 22                         | (100.00) |          | 2                                        | (22.22) | 7                          | (77.78)  |          |
| No                                            | 125                                    | (1.54) | 8017                       | (98.46)  |          | 580                                      | (12.72) | 3979                       | (87.28)  |          |
| Gamma-linolenic acid                          |                                        |        |                            |          | >.999    |                                          |         |                            |          | >.999    |
| Yes                                           | 0                                      | (0.00) | 7                          | (100.00) |          | 0                                        | (0.00)  | 4                          | (100.00) |          |
| No                                            | 125                                    | (1.53) | 8032                       | (98.47)  |          | 582                                      | (12.75) | 3982                       | (87.25)  |          |
| Ginseng & Red ginseng                         |                                        |        |                            |          | 0.035    |                                          |         |                            |          | 0.322    |
| Yes                                           | 5                                      | (4.24) | 113                        | (95.76)  |          | 15                                       | (16.13) | 78                         | (83.87)  |          |
| No                                            | 120                                    | (1.49) | 7926                       | (98.51)  |          | 567                                      | (12.67) | 3908                       | (87.33)  |          |
| Glucosamine                                   |                                        |        |                            |          | >.999    |                                          |         |                            |          | >.999    |
| Yes                                           | 0                                      | (0.00) | 6                          | (100.00) |          | 1                                        | (14.29) | 6                          | (85.71)  |          |
| No                                            | 125                                    | (1.53) | 8033                       | (98.47)  |          | 581                                      | (12.74) | 3980                       | (87.26)  |          |
| Herbal medicine (plant extract) Asian         |                                        |        |                            |          | >.999    |                                          |         |                            |          | >.999    |
| Yes                                           | 0                                      | (0.00) | 20                         | (100.00) |          | 2                                        | (13.33) | 13                         | (86.67)  |          |
| No                                            | 125                                    | (1.53) | 8019                       | (98.47)  |          | 580                                      | (12.74) | 3973                       | (87.26)  |          |
| Herbal medicine (plant extract) Berry         |                                        |        |                            |          | >.999    |                                          |         |                            |          | 0.031    |
| Yes                                           | 0                                      | (0.00) | 9                          | (100.00) |          | 3                                        | (50.00) | 3                          | (50.00)  |          |
| No                                            | 125                                    | (1.53) | 8030                       | (98.47)  |          | 579                                      | (12.69) | 3983                       | (87.31)  |          |
| Herbal medicine (plant extract) Ginkgo Biloba |                                        |        |                            |          | >.999    |                                          |         |                            |          | >.999    |
| Yes                                           | 0                                      | (0.00) | 6                          | (100.00) |          | 0                                        | (0.00)  | 6                          | (100.00) |          |
| No                                            | 125                                    | (1.53) | 8033                       | (98.47)  |          | 582                                      | (12.76) | 3980                       | (87.24)  |          |
| Herbal medicine (plant extract) Others        |                                        |        |                            |          | >.999    |                                          |         |                            |          | >.999    |
| Yes                                           | 0                                      | (0.00) | 46                         | (100.00) |          | 1                                        | (9.09)  | 10                         | (90.91)  |          |
| No                                            | 125                                    | (1.54) | 7993                       | (98.46)  |          | 581                                      | (12.75) | 3976                       | (87.25)  |          |
| Lutein containing supplements                 |                                        |        |                            |          | >.999    |                                          |         |                            |          | 0.627    |
| Yes                                           | 0                                      | (0.00) | 17                         | (100.00) |          | 6                                        | (15.38) | 33                         | (84.62)  |          |
| No                                            | 125                                    | (1.53) | 8022                       | (98.47)  |          | 576                                      | (12.72) | 3953                       | (87.28)  |          |
| Methyl Sulfonyl Methane                       |                                        |        |                            |          | >.999    |                                          |         |                            |          | 0.658    |
| Yes                                           | 0                                      | (0.00) | 4                          | (100.00) |          | 2                                        | (16.67) | 10                         | (83.33)  |          |
| No                                            | 125                                    | (1.53) | 8035                       | (98.47)  |          | 580                                      | (12.73) | 3976                       | (87.27)  |          |
| Milk thistle                                  |                                        |        |                            |          | >.999    |                                          |         |                            |          | >.999    |
| Yes                                           | 0                                      | (0.00) | 23                         | (100.00) |          | 0                                        | (0.00)  | 1                          | (100.00) |          |
| No                                            | 125                                    | (1.54) | 8016                       | (98.46)  |          | 582                                      | (12.74) | 3985                       | (87.26)  |          |
| Omega-3 fatty acid                            |                                        |        |                            |          | 0.041    |                                          |         |                            |          | 0.379    |
| Yes                                           | 5                                      | (4.03) | 119                        | (95.97)  |          | 0                                        | (0.00)  | 11                         | (100.00) |          |
| No                                            | 120                                    | (1.49) | 7920                       | (98.51)  |          | 582                                      | (12.77) | 3975                       | (87.23)  |          |

|                          |     |        |      |          |       |     |         |      |          |       |
|--------------------------|-----|--------|------|----------|-------|-----|---------|------|----------|-------|
| Probiotics (pre-, post-) |     |        |      |          | 0.407 |     |         |      |          | 0.337 |
| Yes                      | 0   | (0.00) | 92   | (100.00) |       | 20  | (10.47) | 171  | (89.53)  |       |
| No                       | 125 | (1.55) | 7947 | (98.45)  |       | 562 | (12.84) | 3815 | (87.16)  |       |
| Propolis                 |     |        |      |          | 0.254 |     |         |      |          | 0.117 |
| Yes                      | 1   | (5.26) | 18   | (94.74)  |       | 1   | (2.94)  | 33   | (97.06)  |       |
| No                       | 124 | (1.52) | 8021 | (98.48)  |       | 581 | (12.81) | 3953 | (87.19)  |       |
| Vitamin & Mineral        |     |        |      |          | 0.490 |     |         |      |          | >.999 |
| Yes                      | 13  | (1.28) | 1001 | (98.72)  |       | 0   | (0.00)  | 5    | (100.00) |       |
| No                       | 112 | (1.57) | 7038 | (98.43)  |       | 582 | (12.75) | 3981 | (87.25)  |       |

The data are shown as N (%) for categorical variables, and p-values were calculated using the chi-square test or Student's t-test. CKD: chronic kidney disease

Supplementary Table S3. General characteristics of the participants according to sex

| Types of dietary supplement                   | Male (n = 5,795) |         |                    |          |       | Female (n = 7,476) |         |                    |          |       |
|-----------------------------------------------|------------------|---------|--------------------|----------|-------|--------------------|---------|--------------------|----------|-------|
|                                               | CKD (n = 389)    |         | Normal (n = 5,406) |          | p     | CKD (n = 344)      |         | Normal (n = 7,132) |          | p     |
|                                               | n                | %       | n                  | %        |       | n                  | %       | n                  | %        |       |
| Aloe                                          |                  |         |                    |          | >.999 |                    |         |                    |          | >.999 |
| Yes                                           | 0                | (0.00)  | 2                  | (100.00) |       | 0                  | (0.00)  | 3                  | (100.00) |       |
| No                                            | 389              | (6.72)  | 5404               | (93.28)  |       | 344                | (4.60)  | 7129               | (95.40)  |       |
| Amino acids & Protein                         |                  |         |                    |          | 0.566 |                    |         |                    |          | 0.009 |
| Yes                                           | 1                | (8.33)  | 11                 | (91.67)  |       | 3                  | (30.00) | 7                  | (70.00)  |       |
| No                                            | 388              | (6.71)  | 5395               | (93.29)  |       | 341                | (4.57)  | 7125               | (95.43)  |       |
| Chlorella/Spirulina                           |                  |         |                    |          | 0.465 |                    |         |                    |          | >.999 |
| Yes                                           | 1                | (11.11) | 8                  | (88.89)  |       | 1                  | (4.35)  | 22                 | (95.65)  |       |
| No                                            | 388              | (6.71)  | 5398               | (93.29)  |       | 343                | (4.60)  | 7110               | (95.40)  |       |
| Gamma-linolenic acid                          |                  |         |                    |          | -     |                    |         |                    |          | >.999 |
| Yes                                           | 0                | (0.00)  | 0                  | (0.00)   |       | 0                  | (0.00)  | 14                 | (100.00) |       |
| No                                            | 389              | (6.71)  | 5406               | (93.29)  |       | 344                | (4.61)  | 7118               | (95.39)  |       |
| Ginseng & Red ginseng                         |                  |         |                    |          | 0.278 |                    |         |                    |          | 0.007 |
| Yes                                           | 9                | (9.47)  | 86                 | (90.53)  |       | 12                 | (9.60)  | 113                | (90.40)  |       |
| No                                            | 380              | (6.67)  | 5320               | (93.33)  |       | 332                | (4.52)  | 7019               | (95.48)  |       |
| Glucosamine                                   |                  |         |                    |          | >.999 |                    |         |                    |          | 0.376 |
| Yes                                           | 0                | (0.00)  | 4                  | (100.00) |       | 1                  | (10.00) | 9                  | (90.00)  |       |
| No                                            | 389              | (6.72)  | 5402               | (93.28)  |       | 343                | (4.59)  | 7123               | (95.41)  |       |
| Herbal medicine (plant extract) Asian         |                  |         |                    |          | 0.465 |                    |         |                    |          | >.999 |
| Yes                                           | 1                | (11.11) | 8                  | (88.89)  |       | 1                  | (3.85)  | 25                 | (96.15)  |       |
| No                                            | 388              | (6.71)  | 5398               | (93.29)  |       | 343                | (4.60)  | 7107               | (95.40)  |       |
| Herbal medicine (plant extract) Berry         |                  |         |                    |          | >.999 |                    |         |                    |          | 0.009 |
| Yes                                           | 0                | (0.00)  | 5                  | (100.00) |       | 3                  | (30.00) | 7                  | (70.00)  |       |
| No                                            | 389              | (6.72)  | 5401               | (93.28)  |       | 341                | (4.57)  | 7125               | (95.43)  |       |
| Herbal medicine (plant extract) Ginkgo Biloba |                  |         |                    |          | >.999 |                    |         |                    |          | >.999 |
| Yes                                           | 0                | (0.00)  | 1                  | (100.00) |       | 0                  | (0.00)  | 11                 | (100.00) |       |
| No                                            | 389              | (6.71)  | 5405               | (93.29)  |       | 344                | (4.61)  | 7121               | (95.39)  |       |
| Herbal medicine (plant extract) Others        |                  |         |                    |          | 0.629 |                    |         |                    |          | >.999 |
| Yes                                           | 0                | (0.00)  | 18                 | (100.00) |       | 1                  | (2.50)  | 39                 | (97.50)  |       |
| No                                            | 389              | (6.73)  | 5388               | (93.27)  |       | 343                | (4.61)  | 7093               | (95.39)  |       |
| Lutein containing supplements                 |                  |         |                    |          | 0.465 |                    |         |                    |          | >.999 |
| Yes                                           | 1                | (11.11) | 8                  | (88.89)  |       | 1                  | (4.55)  | 21                 | (95.45)  |       |
| No                                            | 388              | (6.71)  | 5398               | (93.29)  |       | 343                | (4.60)  | 7111               | (95.40)  |       |
| Methyl Sulfonyl Methane                       |                  |         |                    |          | >.999 |                    |         |                    |          | >.999 |
| Yes                                           | 0                | (0.00)  | 1                  | (100.00) |       | 0                  | (0.00)  | 4                  | (100.00) |       |
| No                                            | 389              | (6.71)  | 5405               | (93.29)  |       | 344                | (4.60)  | 7128               | (95.40)  |       |
| Milk thistle                                  |                  |         |                    |          | 0.257 |                    |         |                    |          | >.999 |
| Yes                                           | 0                | (0.00)  | 28                 | (100.00) |       | 0                  | (0.00)  | 7                  | (100.00) |       |
| No                                            | 389              | (6.75)  | 5378               | (93.25)  |       | 344                | (4.61)  | 7125               | (95.39)  |       |
| Omega-3 fatty acid                            |                  |         |                    |          | 0.006 |                    |         |                    |          | 0.928 |
| Yes                                           | 17               | (12.50) | 119                | (87.50)  |       | 9                  | (4.74)  | 181                | (95.26)  |       |
| No                                            | 372              | (6.57)  | 5287               | (93.43)  |       | 335                | (4.60)  | 6951               | (95.40)  |       |

|                          |     |        |      |          |       |     |        |      |         |       |
|--------------------------|-----|--------|------|----------|-------|-----|--------|------|---------|-------|
| Probiotics (pre-, post-) |     |        |      |          | 0.257 |     |        |      |         | 0.092 |
| Yes                      | 0   | (0.00) | 28   | (100.00) |       | 1   | (0.98) | 101  | (99.02) |       |
| No                       | 389 | (6.75) | 5378 | (93.25)  |       | 343 | (4.65) | 7031 | (95.35) |       |
| Propolis                 |     |        |      |          | >.999 |     |        |      |         | 0.530 |
| Yes                      | 0   | (0.00) | 9    | (100.00) |       | 1   | (6.25) | 15   | (93.75) |       |
| No                       | 389 | (6.72) | 5397 | (93.28)  |       | 343 | (4.60) | 7117 | (95.40) |       |
| Vitamin & Mineral        |     |        |      |          | 0.855 |     |        |      |         | 0.572 |
| Yes                      | 43  | (6.54) | 614  | (93.46)  |       | 44  | (4.26) | 989  | (95.74) |       |
| No                       | 346 | (6.73) | 4792 | (93.27)  |       | 300 | (4.66) | 6143 | (95.34) |       |

The data are shown as N (%) for categorical variables, and p-values were calculated using the chi-square test or Student's t-test. CKD: chronic kidney disease
